# Supplementary material for: Synthesis of non-peripherally tetra-substituted copper(ii) phthalocyanines: characterization, optical and surface properties, fabrication and photo-electrical properties of a photosensitive diode
Source: Royal Society of Chemistry journal article supplement (doi:10.1039/c9dt02868d), 2019-01-01
Supplement: c9dt02868d1.pdf [file c9dt02868d1.pdf]

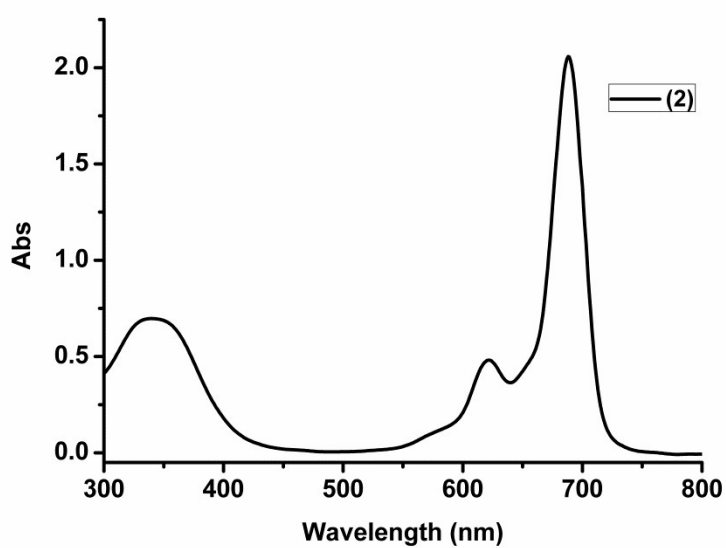

**Fig. S1.** UV-Vis spectra of the compound (2)

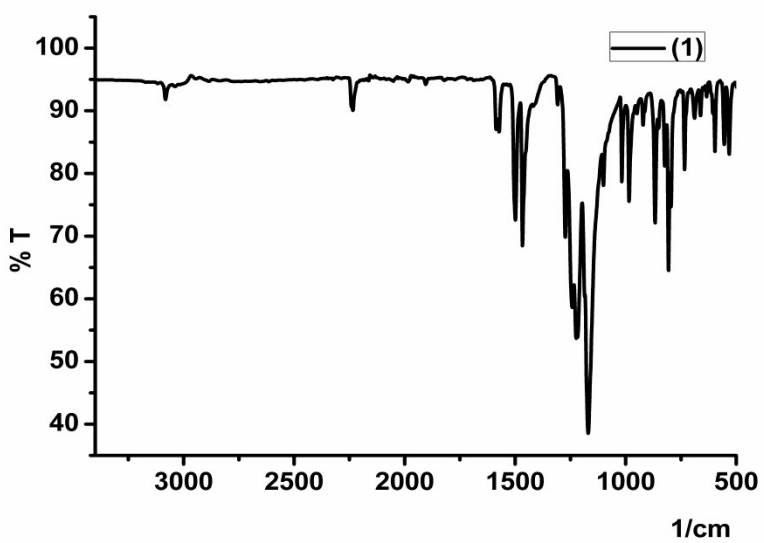

**Fig. S2.** FT-IR spectra of the compound (1)

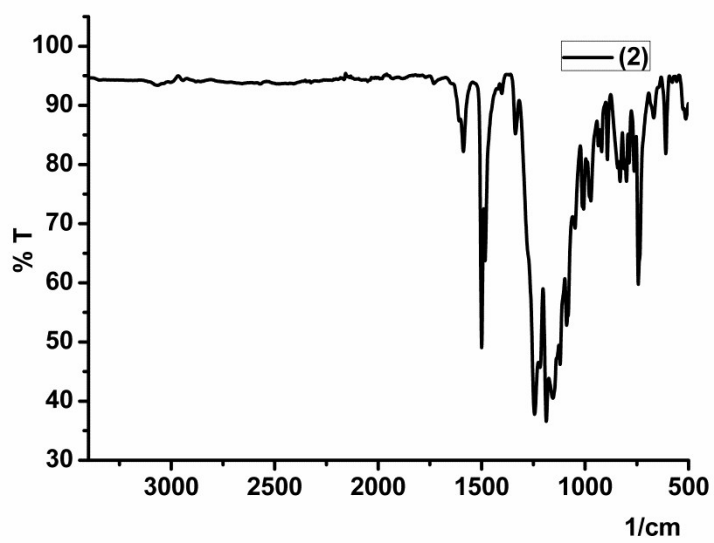

**Fig. S3.** FT-IR spectra of the compound (2)

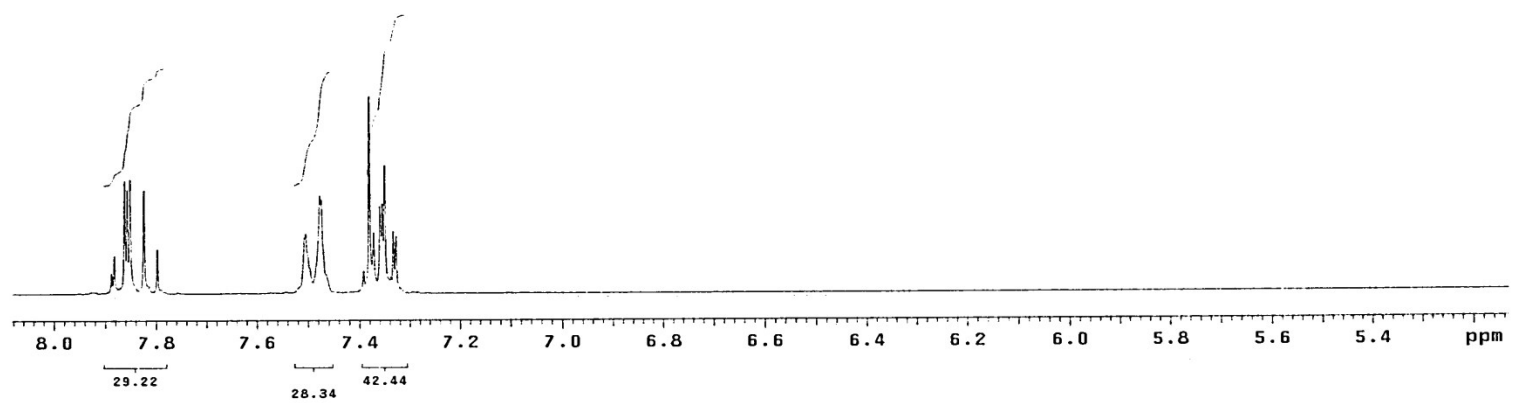

**Fig. S4.** <sup>1</sup>H-NMR spectra of the compound (1)

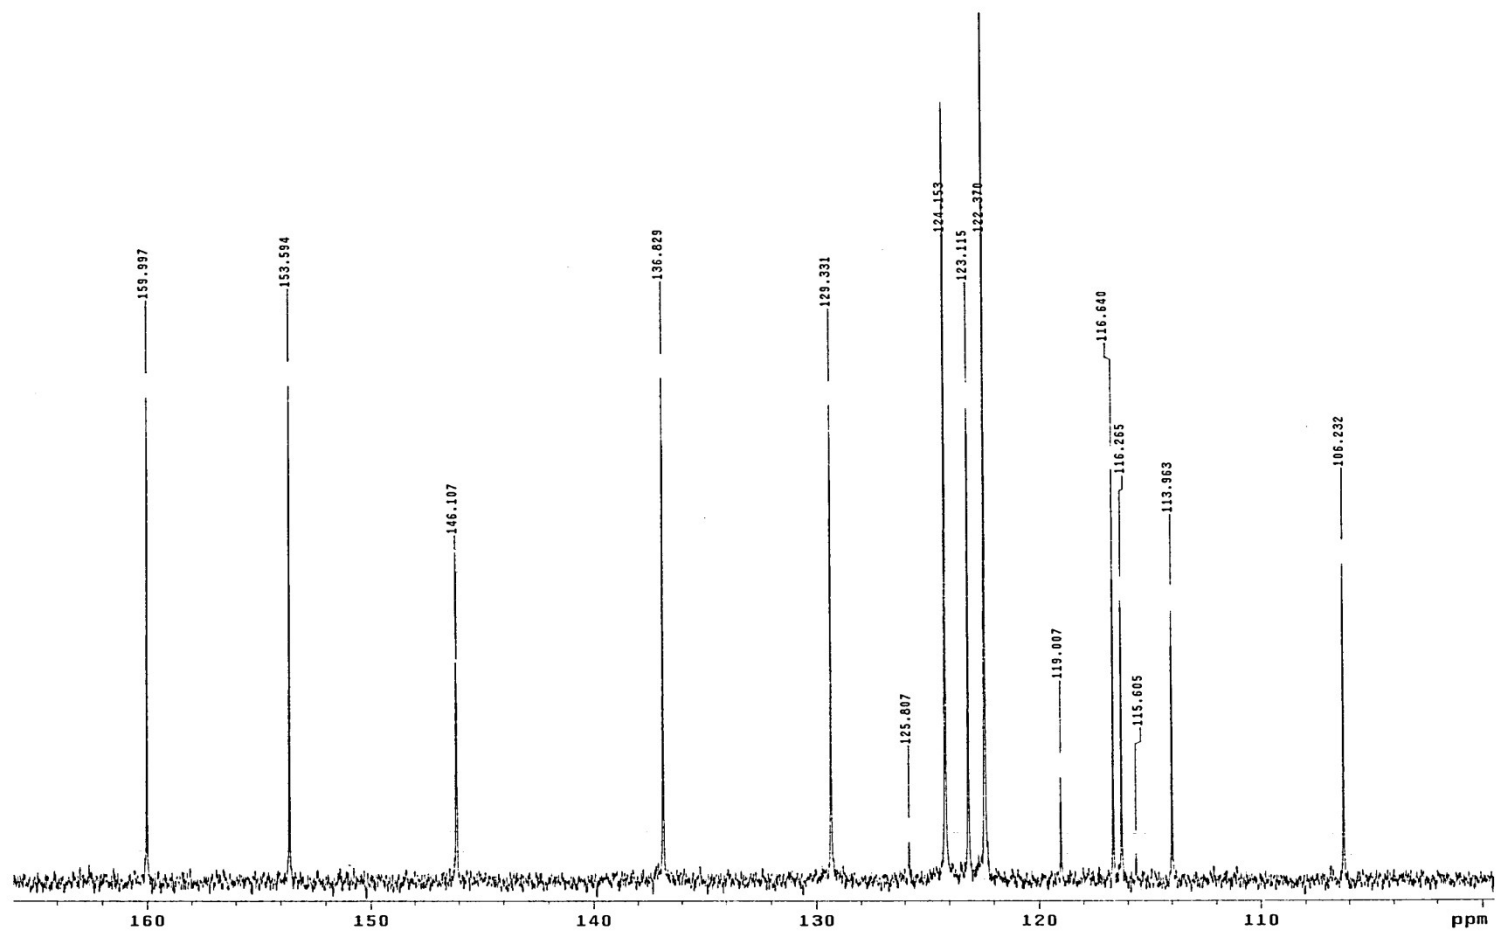

Fig. S5. <sup>13</sup>C-NMR spectra of the compound (1)

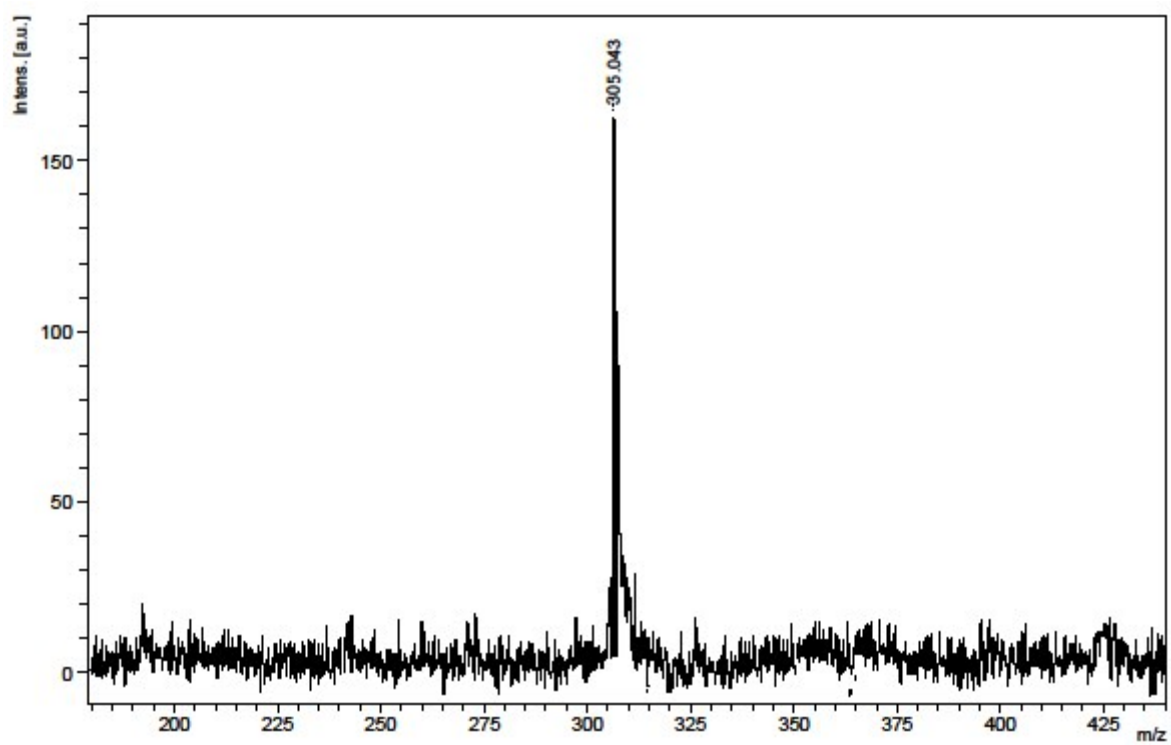

Fig. S6. MALDI-MS spectra of the compound (1)

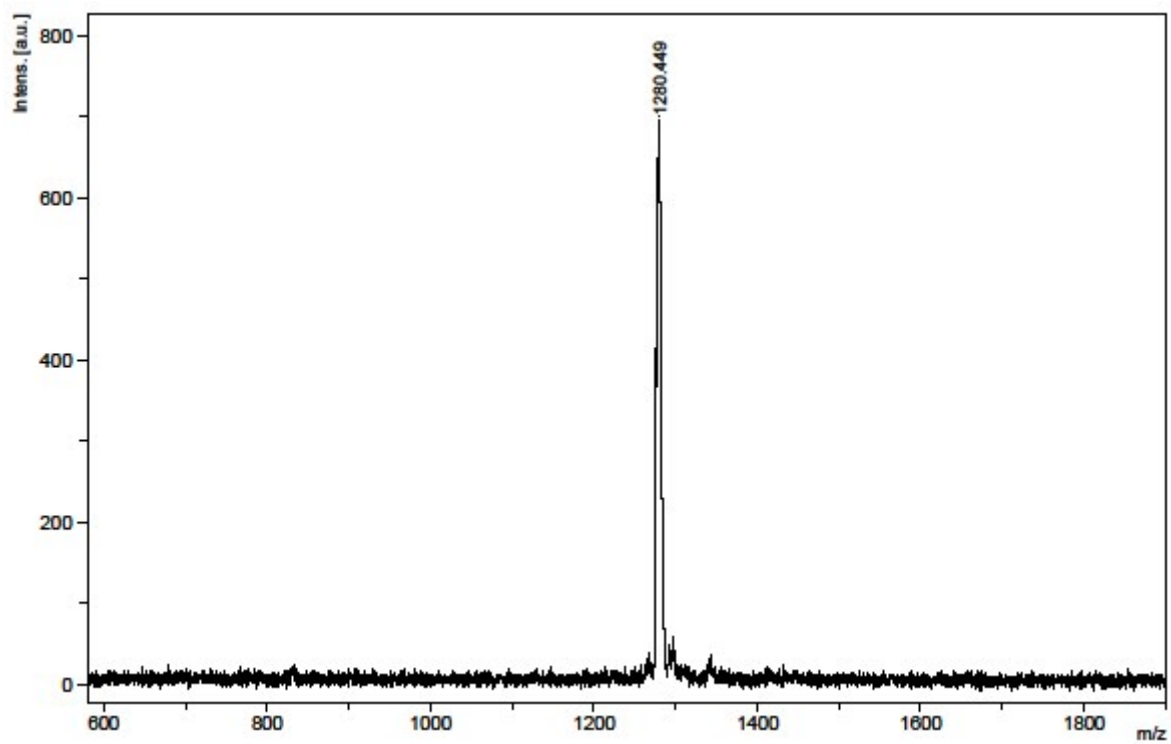

Fig. S7. MALDI-MS spectra of the compound (2)

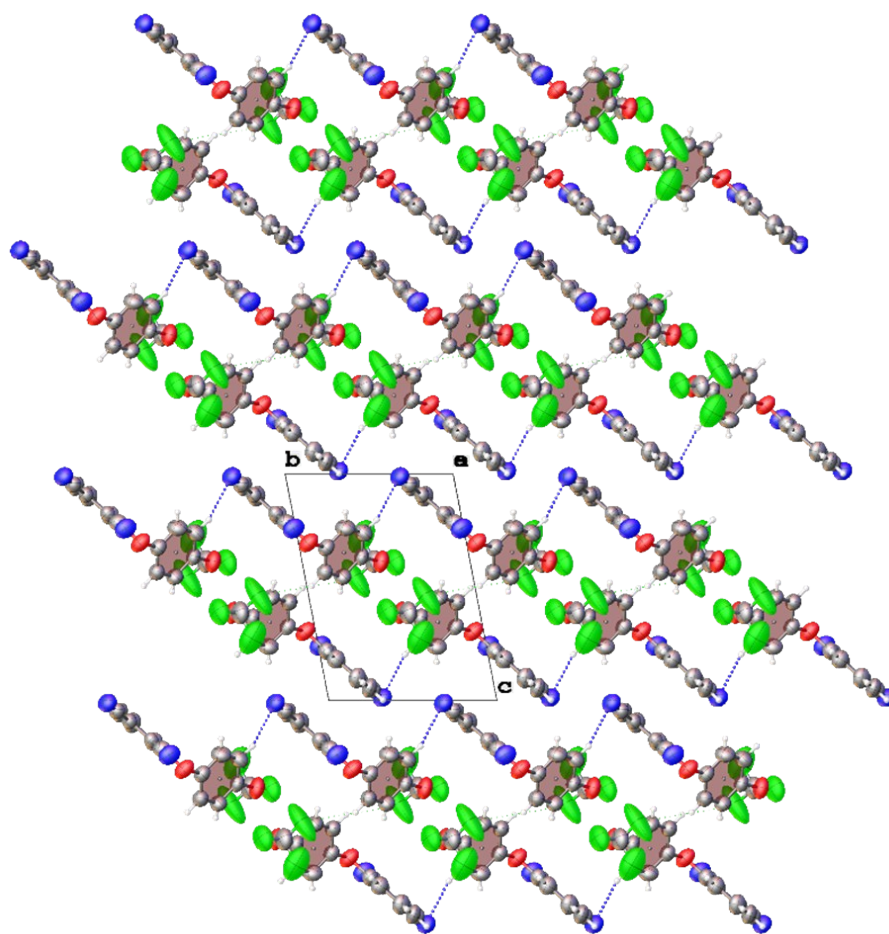

**Fig. S8.** The (100) view of the triclinic molecular assemblies of compound (1) with the stated unitcell. Blue dots indicate the C2—H2...N2 donor-acceptor interaction.

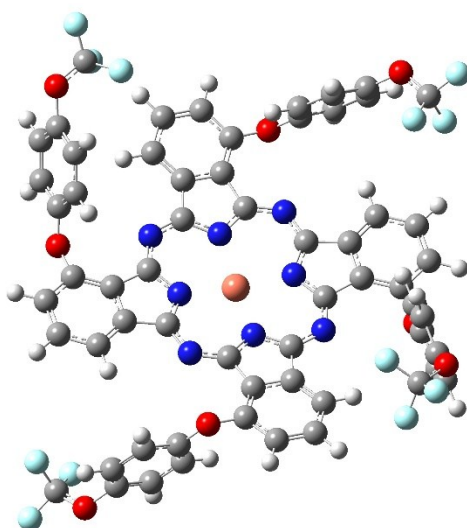

**Fig. S9.** Molecular structure of the obtained CuPc (2)

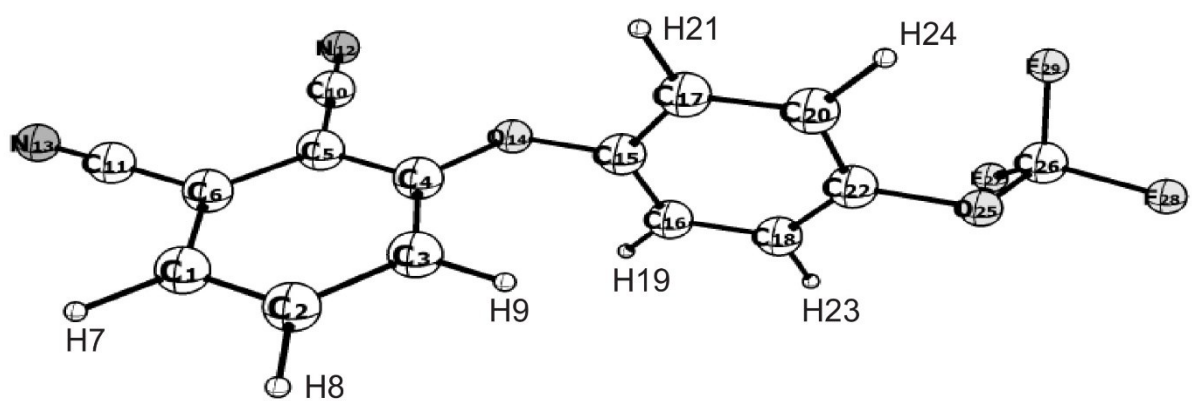

**Fig. S10.** Atomic labelling of the optimized structure of the compound (1)

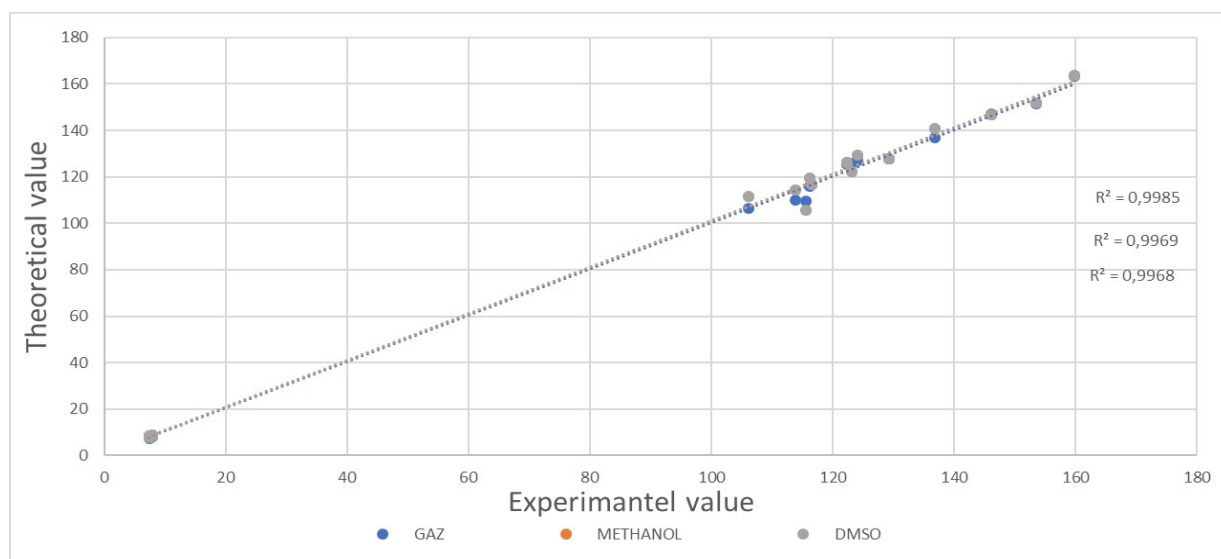

**Fig. S11.** Graph of experimental values against gas and DMSO phases in theoretical calculations for the compound (1)

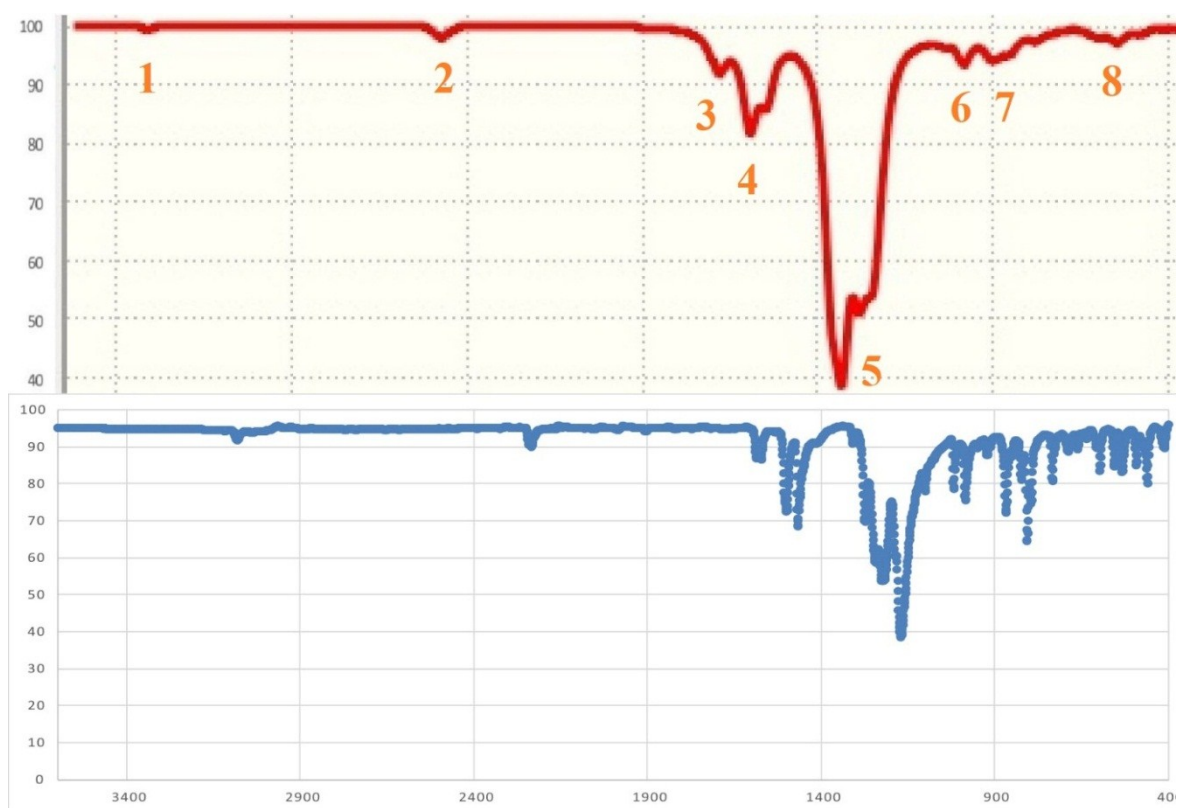

**Fig. S12.** IR spectrum of the compound (1)

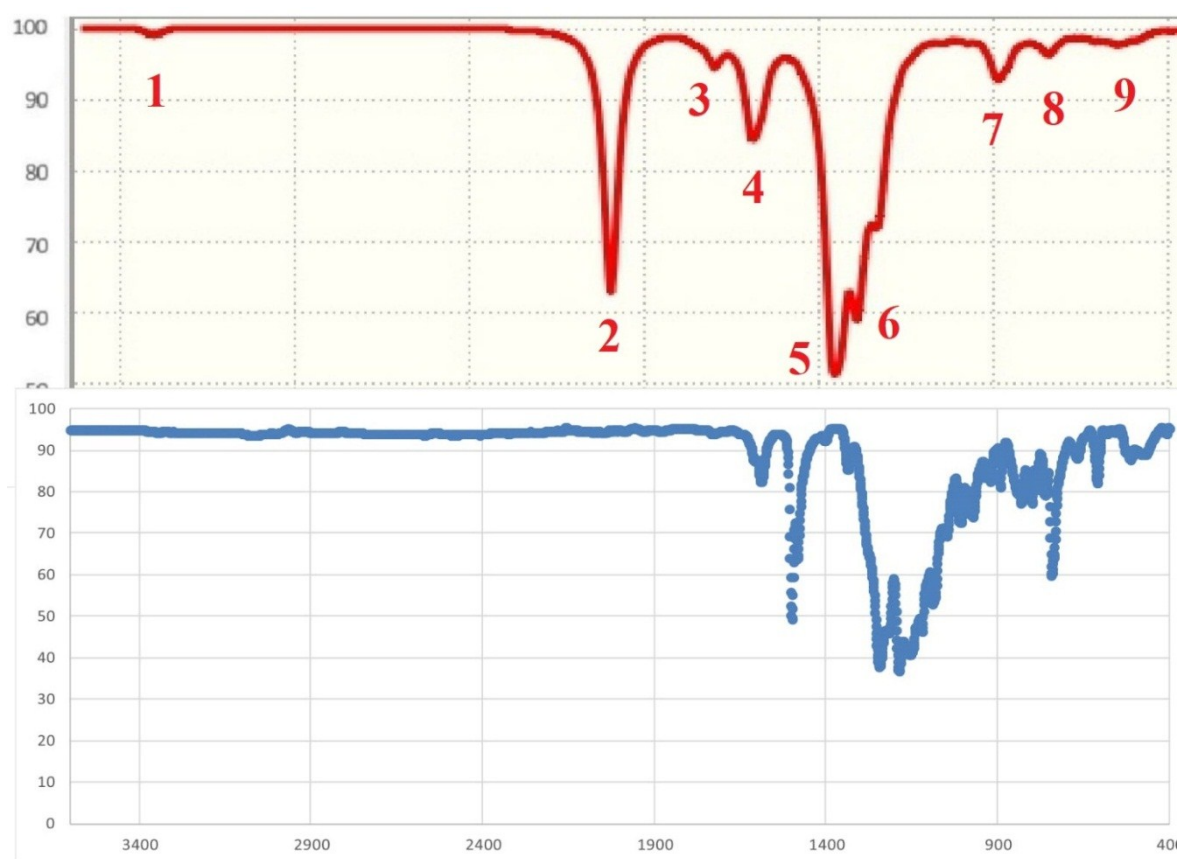

**Fig. S13.** IR spectrum of the CuPc (2)



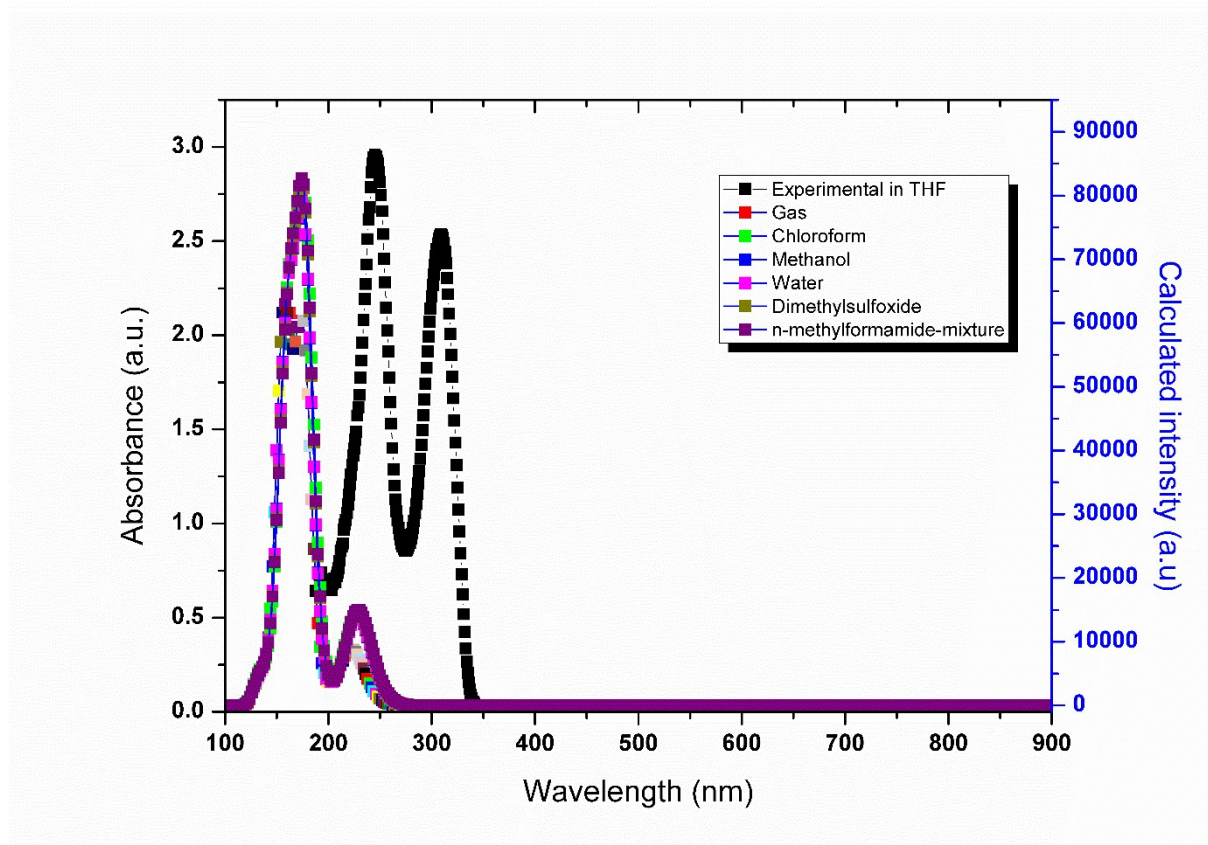

**Fig. S14.** UV-Vis spectrum of the compound (**1**)

**Table S1.** The possible inter-molecular  $\pi \cdots \pi$  ( $Cg \cdots Cg$ ) interactions for the compound (**1**).<sup>a</sup>

| No | $Cg(I) \cdots Cg(J)$ | Symmetry     | $Cg \cdots Cg$ <sup>b</sup> | $Cg(I)$ -perp <sup>c</sup> | $Cg(J)$ -perp <sup>d</sup> | $\alpha$ <sup>e</sup> |
|----|----------------------|--------------|-----------------------------|----------------------------|----------------------------|-----------------------|
| 1  | $Cg(1) \cdots Cg(1)$ | -x, -y, 2-z  | 5.6354                      | 3.5266                     | 3.5266                     | 0.0                   |
| 2  | $Cg(1) \cdots Cg(1)$ | 1-x, -y, 2-z | 4.9619                      | 3.4220                     | 3.4220                     | 0.0                   |
| 3  | $Cg(1) \cdots Cg(2)$ | x, -1+y, z   | 5.5629                      | 3.5982                     | 4.5937                     | 82.499                |
| 4  | $Cg(1) \cdots Cg(2)$ | 1-x, -y, 2-z | 5.8525                      | 2.7042                     | 4.4647                     | 82.499                |
| 5  | $Cg(2) \cdots Cg(2)$ | 1-x, -y, 1-z | 5.7802                      | 2.9329                     | 2.9329                     | 0.0                   |

<sup>a</sup>  $Cg \cdots Cg < 6.0 \text{ \AA}$ . <sup>b</sup> Distances between centroids of the rings. <sup>c</sup> Perpendicular distance of  $Cg(I)$  on ring J plane ( $\text{\AA}$ ). <sup>d</sup> Perpendicular distance of  $Cg(J)$  on ring I plane ( $\text{\AA}$ ). <sup>e</sup> Dihedral angle between planes I and J ( $^\circ$ ).

**Table S2.** The possible inter-molecular Y—X···Cg interactions of the compound **(1)**. <sup>a</sup>

| No | Y—X···Cg(I)        | Symmetry      | X···Cg(I) <sup>b</sup> | X-perp <sup>c</sup> | Y—X···Cg <sup>d</sup> | Y···Cg <sup>e</sup> |
|----|--------------------|---------------|------------------------|---------------------|-----------------------|---------------------|
| 1  | C(15)—F(2)···Cg(1) | 1+x, 1+y, z   | 3.311                  | 3.311               | 127                   | 4.4513              |
| 2  | C(15)—F(2)···Cg(2) | 1-x, 1-y, 1-z | 3.9718                 | 3.675               | 99                    | 4.3631              |
| 3  | C(8)—N(2)···Cg(2)  | -1+x, y, z    | 3.6804                 | 3.659               | 156                   | 4.7484              |

<sup>a</sup> X···Cg < 4.0 Å. <sup>b</sup> Distance between X atom and Cg (Å). <sup>c</sup> Perpendicular distance of X to ring plane (Å). <sup>d</sup> Angle between Y—X···Cg(I) (°). <sup>e</sup> Distance between Y and Cg(I) (Å).

**Table S3.** Energy value of metal atom in lanl2dz basis set

|                        | B3LYP       | HF          | M062X       |
|------------------------|-------------|-------------|-------------|
| <b>Cu<sup>2+</sup></b> | -5308,47607 | -5282,40567 | -5309,81485 |

**Table S4.** Energy values of the molecules with different method (eV)

|                     | <b>(2)</b>   | <b>(ΔG)*</b> |
|---------------------|--------------|--------------|
| <b>B3LYP/3-21g</b>  | -128218.2713 | -34.2914     |
| <b>B3LYP/6-31g</b>  | -128860.7775 | -34.2186     |
| <b>B3LYP/SDD</b>    | -128880.9754 | -35.1349     |
| <b>HF/3-21g</b>     | -127508.5762 | -28.9436     |
| <b>HF/6-31g</b>     | -128133.3988 | -25.1109     |
| <b>HF/SDD</b>       | -128156.9054 | -31.0708     |
| <b>M06-2X/3-21g</b> | -128173.4899 | -35.7542     |
| <b>M06-2X/6-31g</b> | -128818.2923 | -35.4677     |
| <b>M06-2X/SDD</b>   | -128840.2391 | -36.1189     |

\*using lanl2dz level for energy value of metal atoms

**Table S5.** Experimental and calculated  $^1\text{H}$ -NMR and  $^{13}\text{C}$ -NMR chemical shifts (ppm) of the compound (**1**)

|            | GAS    | METHANOL | DMSO   | EXP.  |
|------------|--------|----------|--------|-------|
| <b>C1</b>  | 127.05 | 129.43   | 129.47 | 124.1 |
| <b>C2</b>  | 136.78 | 140.71   | 140.77 | 136.8 |
| <b>C3</b>  | 115.91 | 119.42   | 119.47 | 116.2 |
| <b>C4</b>  | 163.14 | 163.79   | 163.79 | 159.9 |
| <b>C5</b>  | 109.49 | 105.51   | 105.45 | 115.6 |
| <b>C6</b>  | 125.68 | 122.38   | 122.33 | 123.1 |
| <b>C10</b> | 106.46 | 111.53   | 111.59 | 106.2 |
| <b>C11</b> | 109.86 | 114.15   | 114.21 | 113.9 |
| <b>C15</b> | 151.6  | 151.67   | 151.67 | 153.6 |
| <b>C16</b> | 125.38 | 126.3    | 126.31 | 122.3 |
| <b>C17</b> | 125.39 | 126.31   | 126.32 | 122.3 |
| <b>C18</b> | 127.85 | 127.81   | 127.81 | 129.3 |
| <b>C20</b> | 127.85 | 127.81   | 127.81 | 129.3 |
| <b>C22</b> | 147.05 | 146.81   | 146.81 | 146.1 |
| <b>C26</b> | 116.65 | 116.78   | 116.79 | 116.6 |
| <b>H7</b>  | 8.1    | 8.46     | 8.35   | 7.9   |
| <b>H8</b>  | 8.28   | 8.77     | 8.77   | 7.9   |
| <b>H9</b>  | 7.23   | 7.65     | 7.66   | 7.4   |
| <b>H19</b> | 8.11   | 8.34     | 8.35   | 7.75  |
| <b>H21</b> | 8.12   | 8.35     | 8.35   | 7.75  |
| <b>H23</b> | 8.44   | 8.59     | 8.59   | 7.41  |
| <b>H24</b> | 8.44   | 8.59     | 8.59   | 7.41  |

**Table 5.** Selected frequencies of the compounds (**1,2**) at HF/6-31G level

| Compounds         | Band | Teo. Freq (cm <sup>-1</sup> ) | Vibration Modes <sup>a</sup> |
|-------------------|------|-------------------------------|------------------------------|
| <b>Ligand (1)</b> | 1    | 3401                          | STRE (aromatic CH)           |
|                   | 2    | 2563                          | STRE (N=C)                   |
|                   | 3    | 1775                          | STRE (C-C)                   |
|                   | 4    | 1689                          | BEND (H-C-C)                 |
|                   | 5    | 1425                          | STRE (C-O)                   |
|                   | 6    | 1077                          | TORS (H-C=C=C)               |
|                   | 7    | 1004                          | TORS (O-C=C=C)               |
|                   | 8    | 645                           | STRE (C-F)                   |
| <b>CuPc (2)</b>   | 1    | 3384                          | STRE (aromatic CH)           |
|                   | 2    | 2092                          | STRE (N-C)                   |
|                   | 3    | 1792                          | STRE (C-C)                   |
|                   | 4    | 1687                          | BEND (H-C-C)                 |
|                   | 5    | 1455                          | STRE (C-O)                   |
|                   | 6    | 1371                          | STRE (C-O)                   |
|                   | 7    | 971                           | BEND (C-N-C)                 |
|                   | 8    | 953                           | TORS (H-C=C=C)               |
|                   | 9    | 645                           | STRE (C-F)                   |
|                   | 10   | 253                           | STRE (Cu-N)                  |

|    |     |                 |
|----|-----|-----------------|
| 11 | 223 | BEND (Cu-N-C)   |
| 12 | 86  | TORS (Cu-N-C-N) |
